# Supplementary material for: Efficient fiber shaped zinc bromide batteries and dye sensitized solar cells for flexible power sources
Source: Royal Society of Chemistry journal article supplement (doi:10.1039/c4tc02997f), 2015-01-01
Supplement: c4tc02997f1.pdf [file c4tc02997f1.pdf]

1 Supporting Information

2 **Efficient Fiber-shaped Zinc Bromide Batteries and Dye-sensitized Solar Cells for**  
3 **Flexible Power Sources**

4 Ming Peng<sup>a</sup>, Kai Yan<sup>a</sup>, Hsienwei Hu<sup>a</sup>, Dinghan Shen<sup>a</sup>, Weixing Song<sup>b</sup>, and Dechun  
5 Zou<sup>a, b\*</sup>

6

7 [\*] Prof. Dechun Zou (E-mail: dczou@pku.edu.cn)

8 <sup>a</sup>Beijing National Laboratory for Molecular Sciences, Key Laboratory of Polymer  
9 Chemistry and Physics of Ministry of Education, College of Chemistry and Molecular  
10 Engineering, Peking University, Beijing 100871, China. Tel/Fax: +86-10-6275-9799.

11 <sup>b</sup>Beijing Institute of Nanoenergy and Nanosystems, Chinese Academy of Science,  
12 Beijing, China.

13

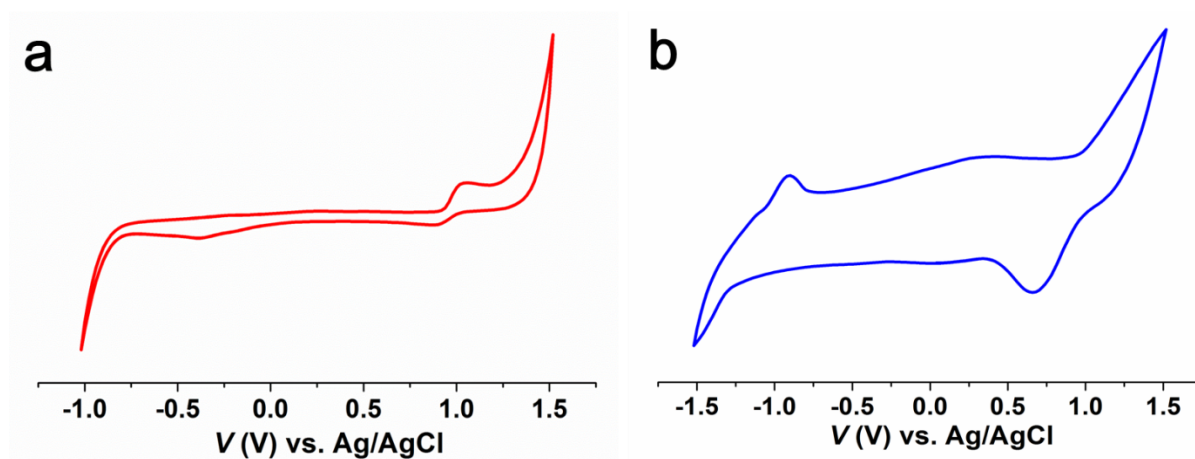

14

15 **Figure S1** Cyclic voltammetry of Pt wire (a) and carbon fiber (b) in diluted ZnBr<sub>2</sub>  
16 solution at 0.10 V/S. (The cathodic peak at -1 V vs Ag<sup>+</sup>/Ag may reflect the reduction  
17 of Zn<sup>2+</sup>.)

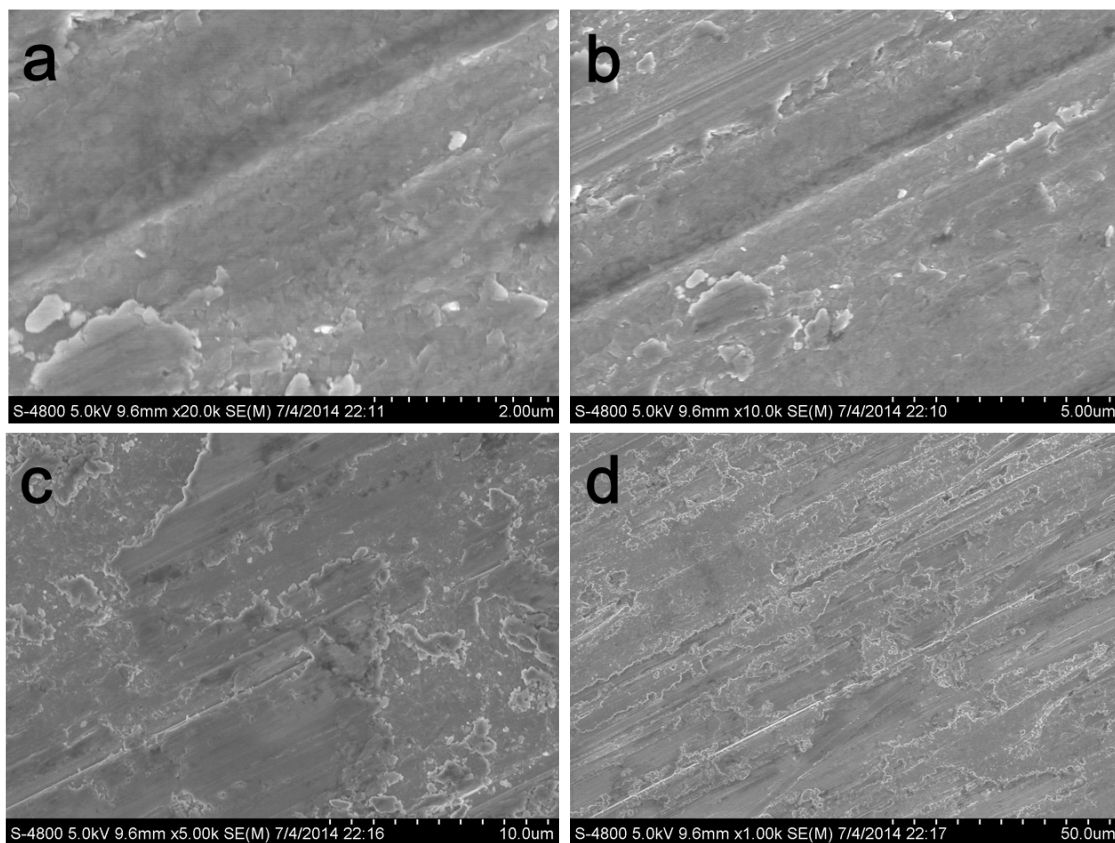

1

2 **Figure S2** Surface morphology of the polished Zn strip.

3

**Table S1** FB parameters under different charge/discharge current densities

| I<br>(mA) | J<br>(mA/mL) | J<br>(A/g<br>Pt) | CE   | VE   | EE   | Q <sub>v</sub><br>(mA<br>h/mL) | E <sub>v</sub><br>(mW<br>h/mL) | P <sub>v</sub><br>(mW/mL) | Q <sub>d</sub><br>(mA<br>h/g) | E <sub>d</sub><br>(mW<br>h/g) | P <sub>d</sub><br>(mW/g) | Q <sub>i</sub><br>(mA<br>h/cm) | E <sub>i</sub><br>(mW<br>h/cm) | P <sub>i</sub><br>(mW/cm) | Q <sub>pt</sub><br>(A<br>h/g) | E <sub>pt</sub><br>(W<br>h/g) | P <sub>pt</sub><br>(W/g) |
|-----------|--------------|------------------|------|------|------|--------------------------------|--------------------------------|---------------------------|-------------------------------|-------------------------------|--------------------------|--------------------------------|--------------------------------|---------------------------|-------------------------------|-------------------------------|--------------------------|
| 10        | 11.11        | 1.56             | 0.86 | 0.80 | 0.69 | 19.15                          | 28.37                          | 16.46                     | 4.84                          | 7.17                          | 4.16                     | 1.92                           | 2.84                           | 1.65                      | 2.69                          | 3.99                          | 2.31                     |
| 20        | 22.22        | 3.13             | 0.86 | 0.76 | 0.65 | 19.01                          | 27.79                          | 32.49                     | 4.80                          | 7.02                          | 8.21                     | 1.90                           | 2.78                           | 3.25                      | 2.67                          | 3.91                          | 4.57                     |
| 40        | 44.44        | 6.25             | 0.93 | 0.66 | 0.61 | 9.48                           | 13.16                          | 61.69                     | 2.40                          | 3.33                          | 15.59                    | 0.95                           | 1.32                           | 6.17                      | 1.33                          | 1.85                          | 8.68                     |
| 50        | 55.56        | 7.81             | 0.94 | 0.64 | 0.60 | 6.27                           | 8.52                           | 75.54                     | 1.58                          | 2.15                          | 19.09                    | 0.63                           | 0.85                           | 7.55                      | 0.88                          | 1.20                          | 10.62                    |

The flexible FB weighs 3.56 g and is 9.0 cm long. It contains a 0.9 mL electrolyte and a 6.4 mg Pt electrode.

4

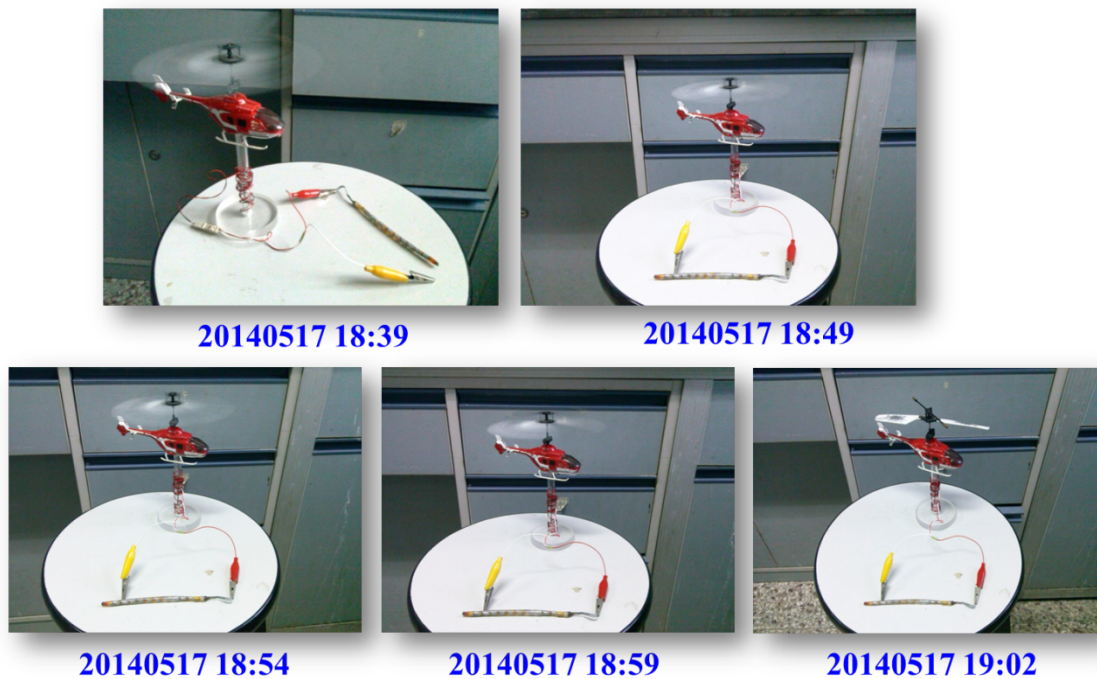

1

2 **Figure S3** After the charge/discharge cycles with a current of 40 mA (~ 40 mA/mL),  
 3 inner layer of the FB remains “orange” and can drive a motor for more than 20  
 4 minutes.

5

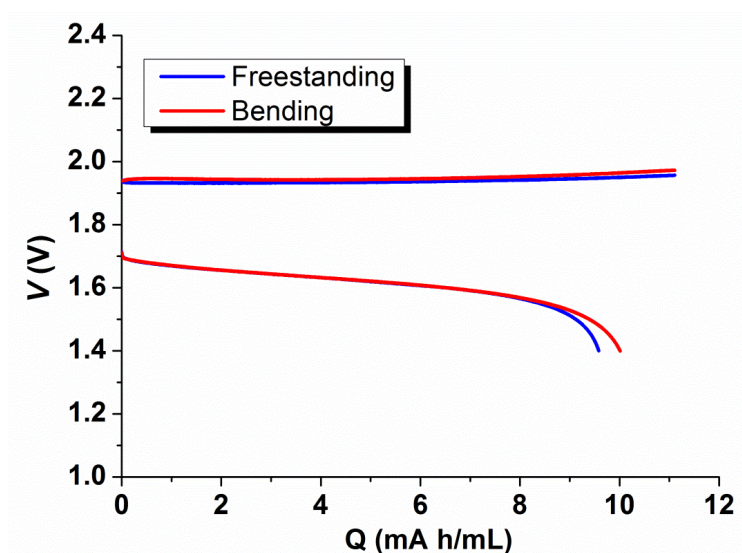

6

7 **Figure S4** Typical charge/discharge curves of the flexible FB in freestanding and  
 8 bending states at 20 mA/mL with a constant charging capacity of 11.11 mA h.

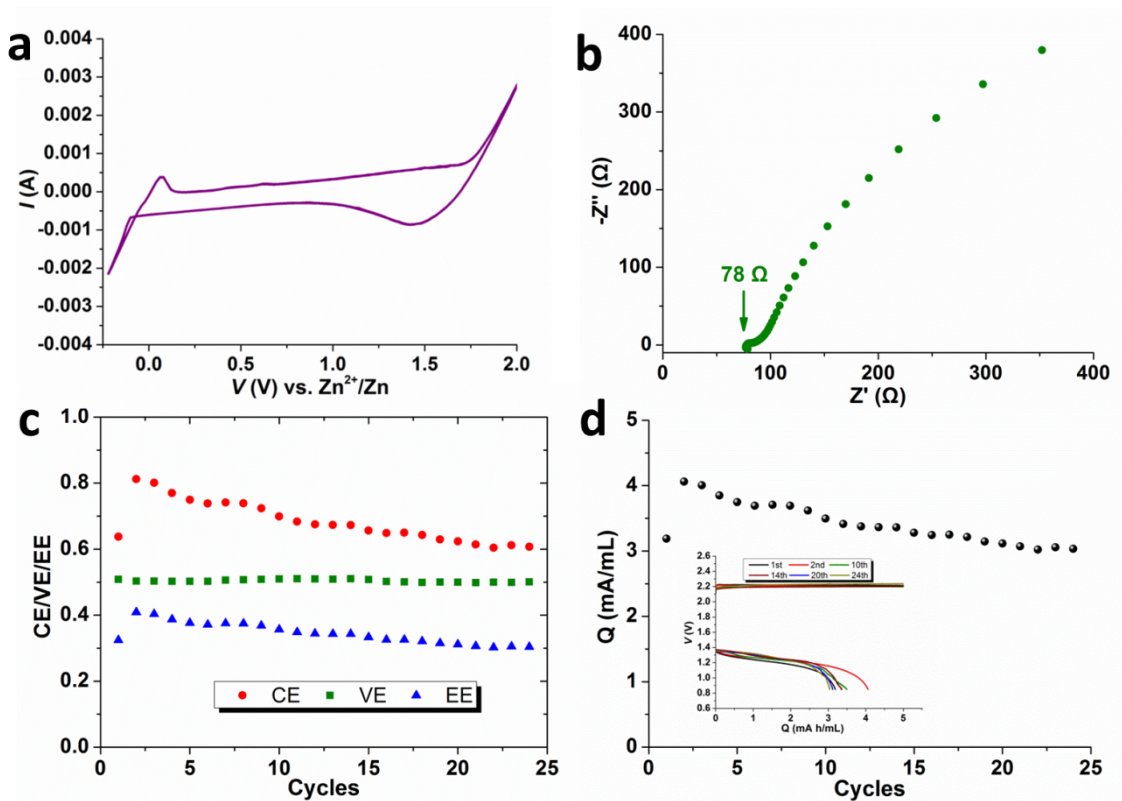

1

2 **Figure S5** (a) Current responses of a typical all CF-based flexible battery (Cathode:  
 3 6.0 mg; electrolyte: 1.0 mL; weight: 2.74 g; length: 10.0 cm) to a linear voltage scan  
 4 at 0.10 V/S at a range of -0.2 V–2.0 V (versus  $Zn^{2+}/Zn$ ); (b) Nyquist plots of the fresh  
 5 device; (c) CE, VE, and EE of the flexible battery with a constant charging capacity  
 6 of 5 mA h at 5 mA/mL (0.50 mA/cm); (d) cycle stability of the flexible battery with a  
 7 constant charging capacity of 5 mA h at 5 mA/mL. Inset: Typical charge/discharge  
 8 curves.

9

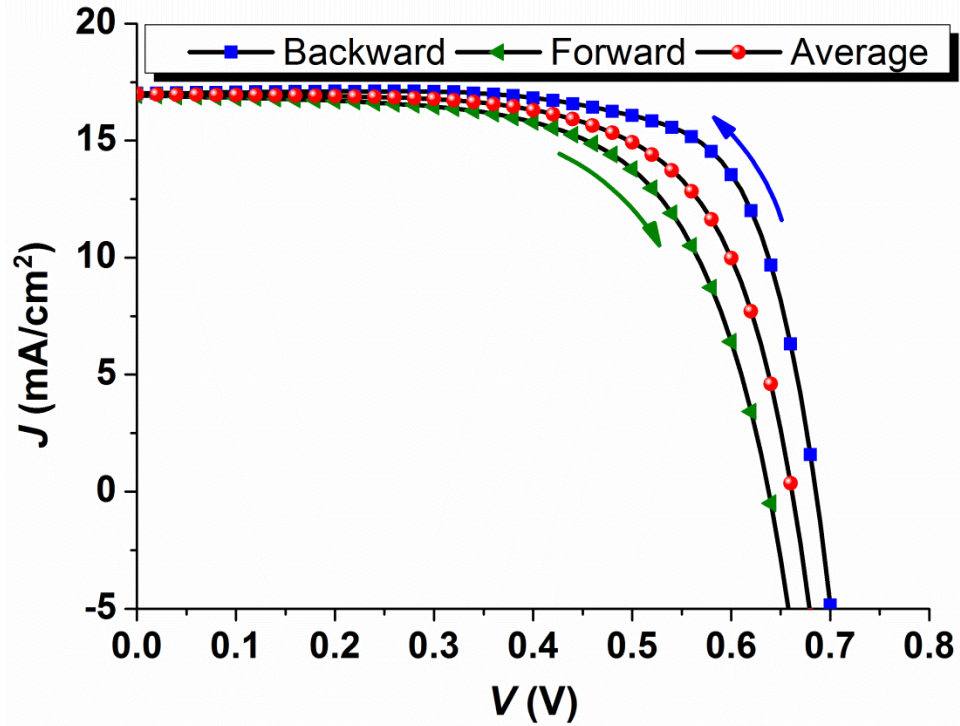

1  
 2 **Figure S6** Current–voltage curves of the efficient FDSC under the forward and  
 3 backward tests, as well as their average.  
 4

**Table S2** Photovoltaic parameters of the efficient FDSC

| Case     | $I_{SC}$ (mA) | $J_{SC}$ (mA/cm <sup>2</sup> )* | $V_{OC}$ (V) | $FF$  | $\eta$ (%) |
|----------|---------------|---------------------------------|--------------|-------|------------|
| Forward  | 0.559         | 16.92                           | 0.638        | 0.641 | 6.92       |
| Backward | 0.562         | 17.03                           | 0.685        | 0.728 | 8.49       |
| Average  | 0.560         | 16.97                           | 0.661        | 0.667 | 7.48       |

\* The illumination area of the FDSC is 0.033 cm<sup>2</sup>.

5

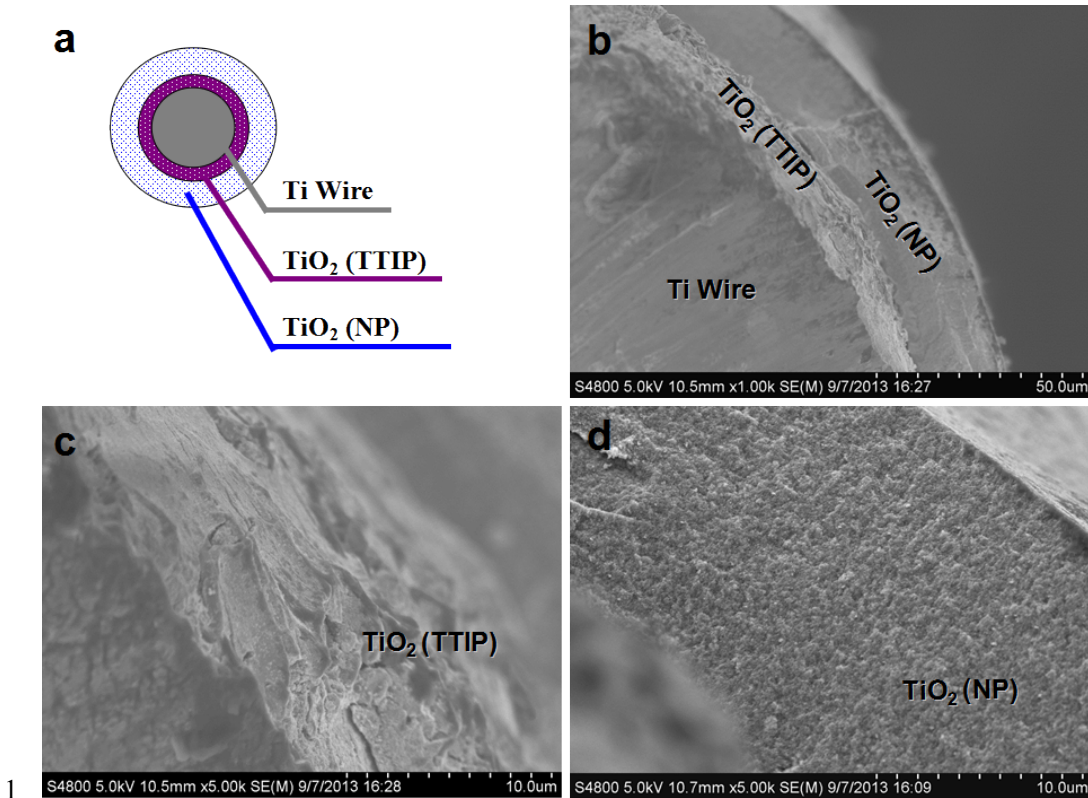

1  
 2 **Figure S7** (a) Schematic diagram of the Ti wire-supported  $\text{TiO}_2$  bilayer structure.  
 3 Field emission scanning electron microscopy images of: (b) cross-section of the as-  
 4 prepared structure; (c) enlarged  $\text{TiO}_2$  layer constructed from titanium  
 5 tetraisopropoxide (TTIP); and d) enlarged  $\text{TiO}_2$  nanoparticle layer generated from a  
 6 home-made  $\text{TiO}_2$  colloid.

7

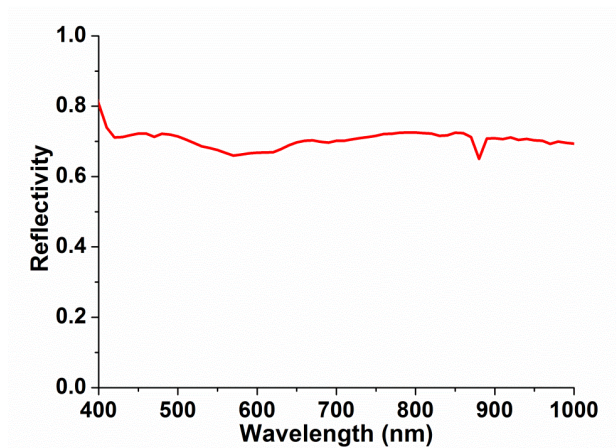

8

9 **Figure S8** Reflectivity of commercial A4 paper.

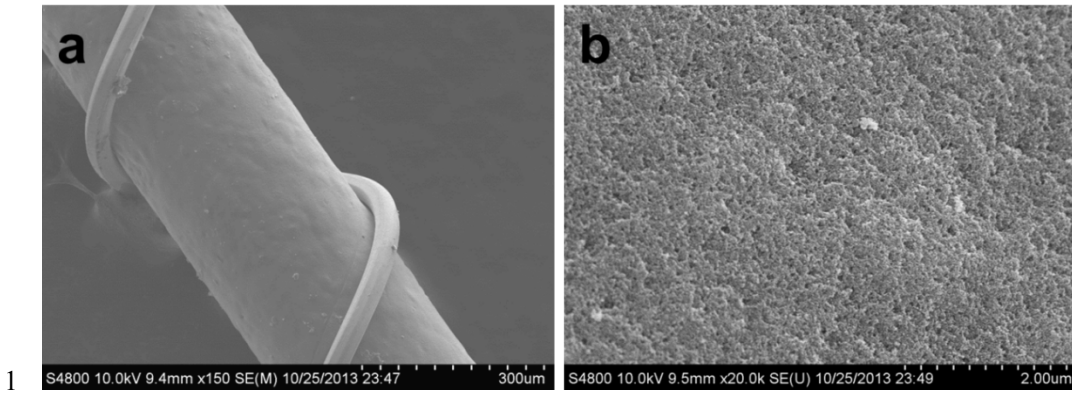

1  
 2 **Figure S9** Morphology of the original fiber photoanode. No cracks were observed on  
 3 the electrode.  
 4

**Table S3** Photovoltaic parameters of the flexible solar device with four FDSCs in series

| $I_{SC}$ (mA) | $J_{SC}$ (mA/cm <sup>2</sup> ) | $V_{OC}$ (V) | $FF$  | $P$ (mW/g) | $\eta$ (%) |
|---------------|--------------------------------|--------------|-------|------------|------------|
| 3.93          | 4.23                           | 3.14         | 0.701 | 2.96       | 9.32       |

Illumination area:  $4 \times 8.00$  cm  $\times$  290  $\mu$ m; weight: 2.92 g.

5

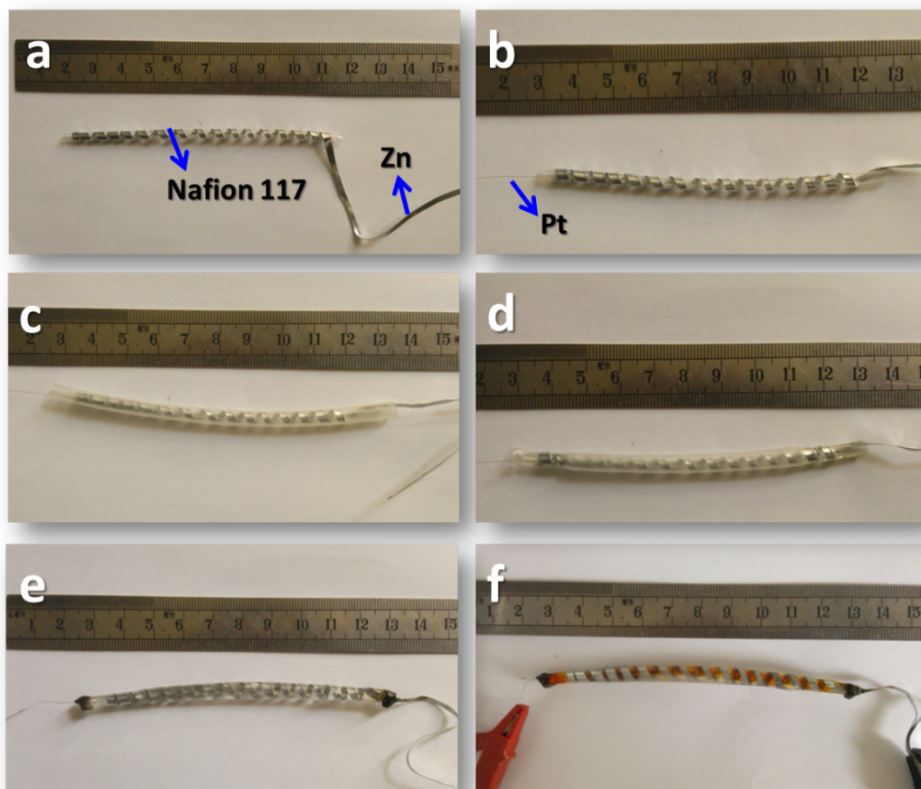

1

2 **Figure S10** Preparation of the flexible battery: a) Pretreated Nafion 117 proton  
 3 exchange membrane is rolled into a cylinder and fixed with a helically-wound Zn  
 4 strip (0.2 cm-0.3 cm wide). The cylinder is immersed in the original  $\text{ZnBr}_2$  solution  
 5 for 24 h. b) Twisted Pt wires are thrust into the Zn-surrounded cylinder. c, d)  
 6 Electrodes are embedded in a heat-shrinkable tube (~10.5 cm) through heating. e, f)  
 7  $\text{ZnBr}_2$  solution (2.00 M, approximately 1 mL) was injected into the tube and fixed  
 8 with melton polyethylene. This device is ready for charge/discharge cycles.

9



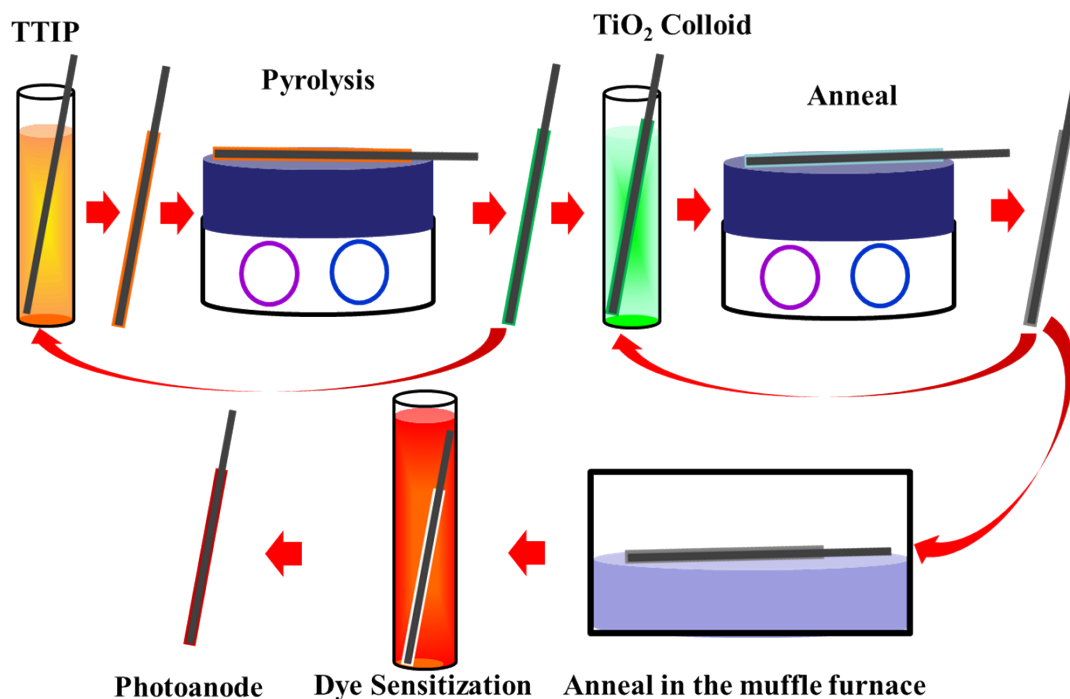

1

2 **Figure S11** Preparation of the fiber-based photoanode with TiO<sub>2</sub> bilayer. 1) A clean,  
 3 polished Ti wire is coated with titanium tetraisopropoxide (TTIP) and pyrolyzed at  
 4 400 °C for 1 min. This procedure is repeated several times until a compact TiO<sub>2</sub> film  
 5 of certain microns is produced. 2) A home-made TiO<sub>2</sub> colloid is dip-coated and  
 6 annealed for 30 s. This procedure is repeated until the target nanoparticle film  
 7 thickness is reached. 3) The as-prepared structure is annealed in a muffle furnace at  
 8 400 °C for another 30 min. 4) The Ti wire-supported TiO<sub>2</sub> bilayer is sensitized with  
 9 N719 ethanol solution for 12 h to form the photoanode.

10 (D. Zou et al, *Nano Energy*, **2013**, 2, 537-544; *J. Power Sources* **2014**, 247, 249-255.)

11

12 **Video I:** The flexible battery can drive a motor.

13 **Video II:** The FDSC device is flexible.

14 **Video III:** A single flexible FDSC can drive a motor.
